# Supplementary material for: Therapy Response Prediction in Patients with Metastatic Soft Tissue Sarcomas Using CT based Delta Radiomics
Source: Research Square preprint supplement (doi:10.21203/rs.3.rs-8259738/v1), 2025-12-11
Supplement: Supplementary file 1 [file 1ead4fcb623802f1d854c7a4.pdf]

# Supplementary Material for: Therapy Response Prediction in Patients with Metastatic Soft Tissue Sarcomas Using CT based Delta Radiomics

Journal: *Clinical & Experimental Metastasis*

Frederik Hartmann <sup>1</sup>, Christianne Jansma <sup>2,3</sup>,  
Manon Verburg<sup>2</sup>, David Hanff <sup>1</sup>, Wiro J. Niessen<sup>4</sup>,  
Geert J.L.H. van Leenders<sup>5</sup>, Cornelis Verhoef<sup>2</sup>, Enrico Martin <sup>3</sup>,  
Stefan Klein <sup>1</sup>, Dirk J. Grünhagen<sup>2</sup>, Martijn P.A. Starmans  
<sup>1,5</sup>, Douwe J. Spaanderman <sup>1</sup>

<sup>1</sup>Department of Radiology and Nuclear Medicine, Erasmus MC Cancer Institute, University Medical Center Rotterdam, Rotterdam, the Netherlands.

<sup>2</sup>Department of Surgical Oncology and Gastrointestinal Surgery, Erasmus MC Cancer Institute, University Medical Center Rotterdam, Rotterdam, the Netherlands.

<sup>3</sup>Department of Plastic and Reconstructive Surgery, University Medical Center Utrecht, Utrecht, the Netherlands.

<sup>4</sup>Faculty of Medical Sciences, University of Groningen, Groningen, the Netherlands.

<sup>5</sup>Department of Pathology and Clinical Bioinformatics, Erasmus MC Cancer Institute, University Medical Center Rotterdam, Rotterdam, the Netherlands.

Corresponding authors: [f.hartmann@erasmusmc.nl](mailto:f.hartmann@erasmusmc.nl);  
[m.starmans@erasmusmc.nl](mailto:m.starmans@erasmusmc.nl);

## Supplement 1: Delta Radiomics Computation

This section formalizes the computation of delta-radiomics at the subject level.

**Metastasis-wise aggregation (with correspondence).** For a given subject, let  $x_i^t \in \mathbb{R}$  denote the value of a scalar radiomic feature measured on metastasis  $i$  at time  $t \in \{0, 1\}$ , where  $t = 0$  is pre-treatment (baseline) and  $t = 1$  is follow-up. If a metastasis-to-metastasis correspondence between time points is available, let  $\mathcal{I}$  be the index set of matched metastases, with  $n = |\mathcal{I}|$  denoting the number of matched metastases.

For each  $i \in \mathcal{I}$  the additive (absolute) change  $d_i$  can be defined as

$$d_i \stackrel{\text{def}}{=} x_i^1 - x_i^0, \quad (1)$$

and, when  $x_i^0 \neq 0$ , the relative change  $d_{i,\text{rel}}$  can be defined as

$$d_{i,\text{rel}} \stackrel{\text{def}}{=} \frac{x_i^1 - x_i^0}{x_i^0}. \quad (2)$$

To obtain a single per-subject delta-radiomic value  $\Delta x$ , we apply an aggregation function  $f$

$$f : \mathbb{R}^n \rightarrow \mathbb{R}, \quad (z_1, \dots, z_n) \mapsto f(z_1, \dots, z_n),$$

that is permutation-invariant (i.e., symmetric). Then

$$\Delta x \stackrel{\text{def}}{=} f((d_i)_{i \in \mathcal{I}}), \quad \Delta x_{\text{rel}} \stackrel{\text{def}}{=} f((d_{i,\text{rel}})_{i \in \mathcal{I}}). \quad (3)$$

In the main analysis,  $f$  was chosen to be the sum,

$$\Delta x = \sum_{i \in \mathcal{I}} d_i, \quad \Delta x_{\text{rel}} = \sum_{i \in \mathcal{I}} d_{i,\text{rel}}. \quad (4)$$

In the supplements, we additionally evaluated the arithmetic mean

$$\Delta x = \frac{1}{p} \sum_{i \in \mathcal{I}} d_i, \quad \Delta x_{\text{rel}} = \frac{1}{p} \sum_{i \in \mathcal{I}} d_{i,\text{rel}}, \quad (5)$$

and the maximum

$$\Delta x = \max_{i \in \mathcal{I}} d_i, \quad \Delta x_{\text{rel}} = \max_{i \in \mathcal{I}} d_{i,\text{rel}}. \quad (6)$$

*Remarks.* (i) Relative changes are undefined when  $x_i^0 = 0$ ; such lesions must be handled with a pre-specified rule, here the replacement with 1 (e.g., corresponding to 100% growth) is chosen. (ii) The definitions above apply to scalar features; vector-valued features can be handled component-wise.

**Image-wise aggregation (without correspondence).** As an alternative, when metastasis-level correspondences are not available, all feature values at each

time point can be aggregated before computing the change to achieve image-wise aggregation.

For each subject  $s$ , the baseline feature values were collected into the vector

$$\mathbf{x}_s^0 = (x_j^0)_{j=1}^{n_0},$$

and the follow-up feature values into

$$\mathbf{x}_s^1 = (x_k^1)_{k=1}^{n_1},$$

where  $n_0$  and  $n_1$  denote the number of segmented metastases at baseline and follow-up, respectively. To obtain a single per-subject delta-radiomic value  $\Delta x$ , we apply an aggregation function  $f$

$$f : \mathbb{R}^m \rightarrow \mathbb{R}$$

separately to  $\mathbf{x}_s^0$  and  $\mathbf{x}_s^1$ . The absolute image-wise delta-radiomic value can now be computed as

$$\Delta x_{\text{img},s} = f(\mathbf{x}_s^1) - f(\mathbf{x}_s^0), \quad (7)$$

and the relative image-wise delta-radiomic value as

$$\Delta x_{\text{rel},\text{img},s} = \begin{cases} \frac{f(\mathbf{x}_s^1) - f(\mathbf{x}_s^0)}{f(\mathbf{x}_s^0)}, & \text{if } f(\mathbf{x}_s^0) \neq 0, \\ 1, & \text{if } f(\mathbf{x}_s^0) = 0. \end{cases} \quad (8)$$

The functions  $f$  evaluated in the supplements are:

$$f_{\text{sum}}(\mathbf{x}) = \sum_{r=1}^m x_r, \quad (9)$$

$$f_{\text{mean}}(\mathbf{x}) = \frac{1}{m} \sum_{r=1}^m x_r, \quad (10)$$

$$f_{\text{max}}(\mathbf{x}) = \max_{1 \leq r \leq m} x_r. \quad (11)$$

Equations (7)–(8) are applied for each choice of  $f$ .

## Supplement 2: PyRadiomics Features

The used features are shown in [Table 1](#). All features are extracted with PyRadiomics using default settings (version 3.1.0).

**Table 1** PyRadiomics features grouped by category

| Category    | Features                                                                                                                                                                                                                                                                                                                                                                                                |
|-------------|---------------------------------------------------------------------------------------------------------------------------------------------------------------------------------------------------------------------------------------------------------------------------------------------------------------------------------------------------------------------------------------------------------|
| Shape       | Elongation, Flatness, LeastAxisLength, MajorAxisLength, Maximum2DDiameterColumn, Maximum2DDiameterRow, Maximum2DDiameterSlice, Maximum3DDiameter, MeshVolume, MinorAxisLength, Sphericity, SurfaceArea, SurfaceVolumeRatio, VoxelVolume                                                                                                                                                                 |
| First-order | 10Percentile, 90Percentile, Energy, Entropy, InterquartileRange, Kurtosis, Maximum, MeanAbsoluteDeviation, Mean, Median, Minimum, Range, RobustMeanAbsoluteDeviation, RootMeanSquared, Skewness, TotalEnergy, Uniformity, Variance                                                                                                                                                                      |
| GLCM        | Autocorrelation, ClusterProminence, ClusterShade, ClusterTendency, Contrast, Correlation, DifferenceAverage, DifferenceEntropy, DifferenceVariance, Id, Idm, Idmn, Idn, Imc1, Imc2, InverseVariance, JointAverage, JointEnergy, JointEntropy, MCC, MaximumProbability, SumAverage, SumEntropy, SumSquares                                                                                               |
| GLDM        | DependenceEntropy, DependenceNonUniformity, DependenceNonUniformityNormalized, DependenceVariance, GrayLevelNonUniformity, GrayLevelVariance, HighGrayLevelEmphasis, LargeDependenceEmphasis, LargeDependenceHighGrayLevelEmphasis, LargeDependenceLowGrayLevelEmphasis, LowGrayLevelEmphasis, SmallDependenceEmphasis, SmallDependenceHighGrayLevelEmphasis, SmallDependenceLowGrayLevelEmphasis       |
| GLRLM       | GrayLevelNonUniformity, GrayLevelNonUniformityNormalized, GrayLevelVariance, HighGrayLevelRunEmphasis, LongRunEmphasis, LongRunHighGrayLevelEmphasis, LongRunLowGrayLevelEmphasis, LowGrayLevelRunEmphasis, RunEntropy, RunLengthNonUniformity, RunLengthNonUniformityNormalized, RunPercentage, RunVariance, ShortRunEmphasis, ShortRunHighGrayLevelEmphasis, ShortRunLowGrayLevelEmphasis             |
| GLSZM       | GrayLevelNonUniformity, GrayLevelNonUniformityNormalized, GrayLevelVariance, HighGrayLevelZoneEmphasis, LargeAreaEmphasis, LargeAreaHighGrayLevelEmphasis, LargeAreaLowGrayLevelEmphasis, LowGrayLevelZoneEmphasis, SizeZoneNonUniformity, SizeZoneNonUniformityNormalized, SmallAreaEmphasis, SmallAreaHighGrayLevelEmphasis, SmallAreaLowGrayLevelEmphasis, ZoneEntropy, ZonePercentage, ZoneVariance |
| NGTDM       | Busyness, Coarseness, Complexity, Contrast, Strength                                                                                                                                                                                                                                                                                                                                                    |

## Supplement 3

[Table 2](#) shows the results of the method presented in the main texts of the paper as well as the additionally performed experiments outlined in [Supplements 1](#).

**Table 2** Results from the presented main experiment (metastasis-wise,sum,relative) and supplementary approaches. For each metric, the arithmetic mean and 95% confidence intervals are reported. The highest mean value across all approaches is shown in bold, while the highest mean values within each input type (Full Radiomics, Diameter-only, and Volume-only) are underlined. In case of identical means, the value with the narrower 95% confidence interval is highlighted.

| Merging         | Aggregation | Abs or Rel | Full radiomics (imaging) input  |                                 | Diameter-only     |                   | Volume-Only       |                   |
|-----------------|-------------|------------|---------------------------------|---------------------------------|-------------------|-------------------|-------------------|-------------------|
|                 |             |            | c-index                         | cAUC                            | c-index           | cAUC              | c-index           | cAUC              |
| metastasis-wise | sum         | relative   | <b>0.68</b> <u>[0.60; 0.76]</u> | <b>0.75</b> <u>[0.55; 0.95]</u> | 0.61 [0.51; 0.70] | 0.60 [0.35; 0.85] | 0.65 [0.53; 0.76] | 0.63 [0.38; 0.88] |
| metastasis-wise | sum         | absolute   | 0.55 [0.44; 0.66]               | 0.52 [0.33; 0.71]               | 0.63 [0.53; 0.72] | 0.60 [0.35; 0.84] | 0.61 [0.52; 0.71] | 0.59 [0.35; 0.82] |
| metastasis-wise | mean        | relative   | 0.66 [0.58; 0.75]               | 0.72 [0.56; 0.87]               | 0.61 [0.51; 0.72] | 0.57 [0.33; 0.82] | 0.63 [0.53; 0.72] | 0.60 [0.35; 0.85] |
| metastasis-wise | mean        | absolute   | 0.55 [0.46; 0.65]               | 0.48 [0.23; 0.73]               | 0.65 [0.56; 0.74] | 0.57 [0.32; 0.82] | 0.60 [0.50; 0.69] | 0.56 [0.32; 0.79] |
| metastasis-wise | max         | relative   | 0.62 [0.52; 0.73]               | 0.67 [0.44; 0.90]               | 0.63 [0.52; 0.73] | 0.60 [0.35; 0.86] | 0.63 [0.53; 0.73] | 0.60 [0.37; 0.83] |
| metastasis-wise | max         | absolute   | 0.61 [0.51; 0.70]               | 0.63 [0.38; 0.86]               | 0.66 [0.58; 0.74] | 0.68 [0.48; 0.87] | 0.61 [0.51; 0.71] | 0.57 [0.35; 0.79] |
| image-wise      | sum         | relative   | 0.51 [0.43; 0.61]               | 0.47 [0.28; 0.67]               | 0.58 [0.48; 0.68] | 0.49 [0.23; 0.75] | 0.56 [0.47; 0.64] | 0.48 [0.26; 0.70] |
| image-wise      | sum         | absolute   | 0.45 [0.34; 0.55]               | 0.48 [0.28; 0.68]               | 0.42 [0.31; 0.53] | 0.40 [0.22; 0.59] | 0.48 [0.40; 0.57] | 0.48 [0.27; 0.68] |
| image-wise      | mean        | relative   | 0.51 [0.40; 0.62]               | 0.49 [0.30; 0.67]               | 0.57 [0.45; 0.68] | 0.50 [0.23; 0.76] | 0.55 [0.45; 0.64] | 0.51 [0.28; 0.73] |
| image-wise      | mean        | absolute   | 0.52 [0.41; 0.64]               | 0.60 [0.40; 0.80]               | 0.50 [0.41; 0.59] | 0.53 [0.34; 0.73] | 0.44 [0.36; 0.52] | 0.45 [0.29; 0.61] |
| image-wise      | max         | relative   | 0.52 [0.41; 0.62]               | 0.52 [0.29; 0.75]               | 0.60 [0.49; 0.72] | 0.56 [0.33; 0.78] | 0.57 [0.47; 0.67] | 0.50 [0.28; 0.72] |
| image-wise      | max         | absolute   | 0.47 [0.38; 0.56]               | 0.55 [0.37; 0.73]               | 0.53 [0.43; 0.63] | 0.58 [0.35; 0.81] | 0.52 [0.40; 0.63] | 0.51 [0.29; 0.74] |

## Supplement 4

Figure 1 shows how often features were selected in the outer training folds of the main experiment (metastasis-wise merging of relative delta radiomics using the sum).

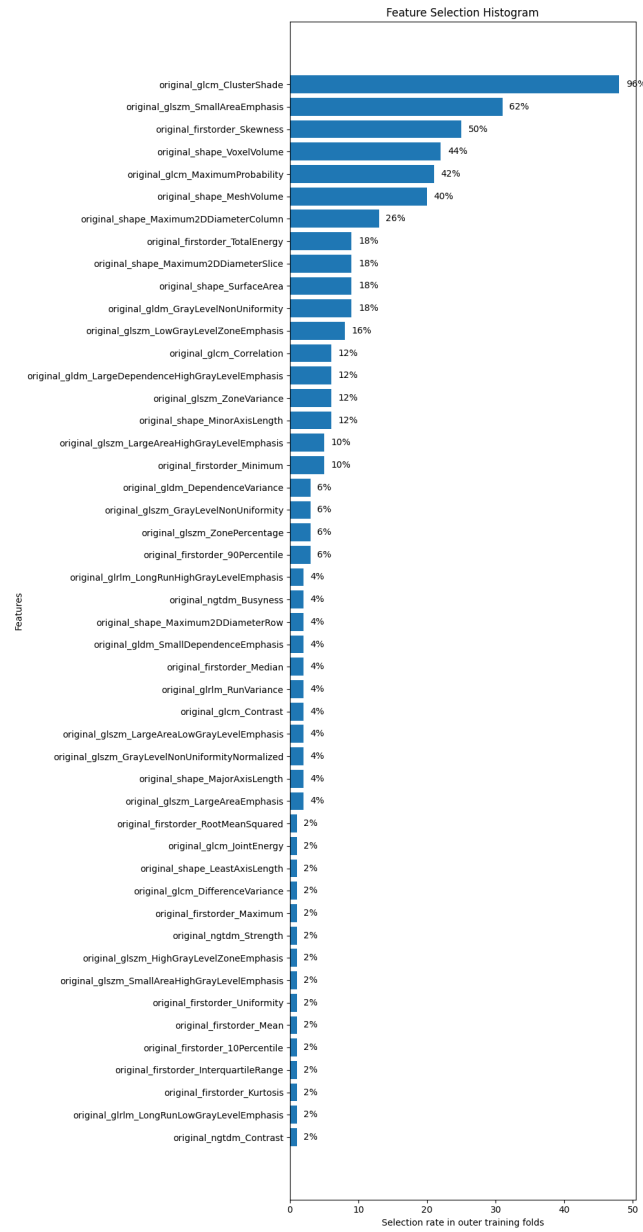

**Figure 1** Histogram of selected features. Percentage calculations are relative to the fifty outer folds. E.g., a selection rate of 4% corresponds to a selection of that feature in two of the fifty outer folds.
